# Supplementary material for: Role of VTC4 in Stress Response and Regulation of Inorganic Polyphosphate Levels in Yeast
Source: Preprints.org preprint supplement (doi:10.20944/preprints202010.0484.v1), 2020-10-23
Supplement: Supplementary file 1 [file supplementary]

Supplemental Table S1

*S. cerevisiae* gene-specific primers used in quantitative real-time (qRT)-PCR experiment

| Gene > Standard Name | Gene > Systematic Name | Gene > Brief description | Primer | Oligonucleotide sequence( 5 --> 3) |
| --- | --- | --- | --- | --- |
| ALG9 | YNL219C | Mannosyltransferase, involved in N-linked glycosylation | Alg9_F | TAC CGG TAA AGA GTG GCC GA |
| Alg9_R | TGC AGC ACA TGC CAG CTT AT |
| DDR2 | YOL052C-A | Multi-stress response protein | Ddr2_F | AAA AAG GCC AAA GCA CCA CC |
| Ddr2_R | AAA ACG CAT CCA ACA CCA CG |
| PHM7 | YOL084W | Protein of unknown function | Phm7_F | TCT TTT GGG CTT TCC CCG TT |
| Phm7_R | GAC ACC CAT CAG GAA GGT GG |
| PHO5 | YBR093C | Repressible acid phosphatase | Pho5_F | TCA ACA TCA CCT TGC AGA CTG T |
| Pho5_R | TCG TAG TCC CAA GCA GGA CA |
| PHO84 | YML123C | High-affinity inorganic phosphate (Pi) transporter | Pho84_F | ACG CAA ACT CTG GTG CTG AA |
| Pho84_R | CCA AAA TGC AGT CGA TGC GG |
